# Supplementary material
Source: PubMed Central journal article supplement (PMC4805664)
Supplement: thnov06p0698s1.pdf [file thnov06p0698s1.pdf]

## **Supporting Information**

### **Preliminary Therapy Evaluation of $^{225}\text{Ac}$ -DOTA-c(RGDyK) Demonstrates that Cerenkov Radiation Derived from $^{225}\text{Ac}$ Daughter Decay Can Be Detected by Optical Imaging for *In Vivo* Tumor Visualization**

Darpan N. Pandya<sup>1</sup>, Roy Hantgan<sup>2</sup>, Mikalai M. Budzevich<sup>3</sup>, Nancy D. Kock<sup>4</sup>, David L. Morse<sup>5</sup>, Izadora Batista<sup>6</sup>, Akiva Mintz<sup>1,6,7</sup>, King C. Li<sup>7</sup>, Thaddeus J. Wadas<sup>\*1,7</sup>

<sup>1</sup>Department of Cancer Biology, Wake Forest School of Medicine, Winston-Salem, NC 27157 USA

<sup>2</sup>Department of Biochemistry, Wake Forest School of Medicine, Winston-Salem, NC 27157 USA

<sup>3</sup>Small Animal Imaging Laboratory, H. Lee Moffitt Cancer Center & Research Institute, Tampa, FL 33612 USA

<sup>4</sup>Department of Pathology-Section on Comparative Medicine, Wake Forest School of Medicine, Winston-Salem, NC 27157 USA

<sup>5</sup>Department of Cancer Imaging and Metabolism, H. Lee Moffitt Cancer Center & Research Institute, Tampa, FL 33612 USA

<sup>6</sup>Department of Neurosurgery, Wake Forest School of Medicine, Winston-Salem, NC 27157 USA

<sup>7</sup>Department of Radiology, Wake Forest School of Medicine, Winston-Salem, NC 27157 USA

\*Corresponding author:

Thaddeus J. Wadas, Ph.D.

Assistant Professor of Cancer Biology and  
Radiology

Wake Forest School of Medicine

Medical Center Blvd.

Winston-Salem, NC 27157

phone: (336) 716-5696

fax: (336) 716-0255

e-mail: twadas@wakehealth.edu

## **Table of Contents**

| <b>Section</b>                                                                                                                     | <b>Page Number</b> |
|------------------------------------------------------------------------------------------------------------------------------------|--------------------|
| Scheme S1. Synthesis of La-DOTA-c(RGDyK)                                                                                           | 3                  |
| Scheme S2. Radiochemical synthesis of $^{225}\text{Ac}$ -DOTA-c(RGDyK)                                                             | 3                  |
| Figure S1. ESI-MS analysis of La-DOTA-c(RGDyK)                                                                                     | 4                  |
| Figure S2. Reversible two-state bimolecular interaction model for integrin binding                                                 | 5                  |
| Figure S3. Recombinant human $\alpha_v\beta_3$ binding to immobilized c(RGDyK) monitored by surface plasmon resonance spectroscopy | 6                  |
| Figure S4. La-DOTA-c(RGDyK) inhibition of $\alpha_v\beta_3$ :c(RGDyK) binding monitored by surface plasmon resonance spectroscopy  | 7                  |
| Figure S5. Quality control of $^{225}\text{Ac}$ -DOTA-c(RGDyK)                                                                     | 8                  |
| Table S1. <i>In vitro</i> serum stability of $^{225}\text{Ac}$ -DOTA-c(RGDyK)                                                      | 9                  |
| Figure S6. <i>In vitro</i> serum stability of $^{225}\text{Ac}$ -DOTA-c(RGDyK) by size exclusion-HPLC                              | 10                 |
| Table S2. Biodistribution of $^{225}\text{Ac}$ -DOTA-c(RGDyK)                                                                      | 11                 |
| Figure S7. Graphical summary: biodistribution of $^{225}\text{Ac}$ -DOTA-c(RGDyK)                                                  | 12                 |
| Figure S8. <i>Ex vivo</i> Cerenkov luminescence imaging of selected organs                                                         | 13                 |
| Table S3. Estimated average tumor and kidney dose for animals receiving $^{225}\text{Ac}$ -DOTA-c(RGDyK)                           | 14                 |
| Figure S9. Maximum tolerated dose and preliminary therapy studies of $^{225}\text{Ac}$ -DOTA-c(RGDyK)                              | 15                 |
| Figure S10. Histology of select tissues from MTD studies                                                                           | 16                 |

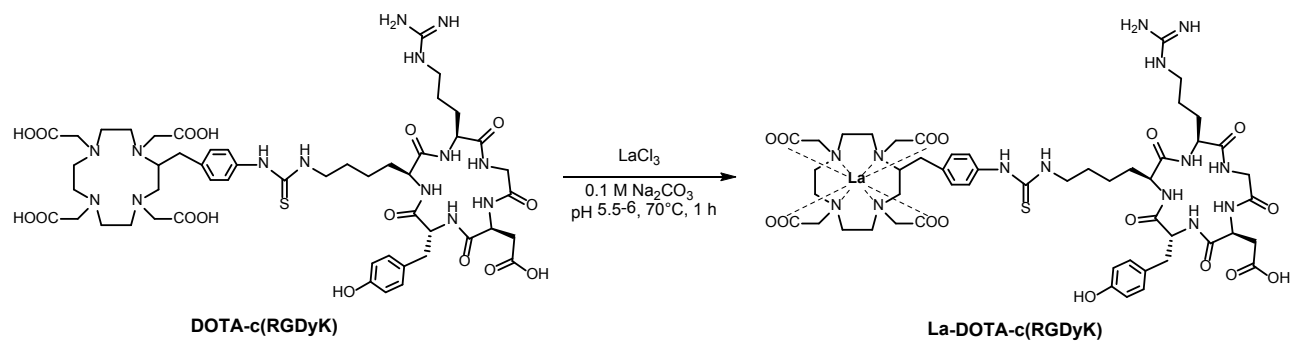

**Scheme S1. Synthesis of La-DOTA-c(RGDyK)**

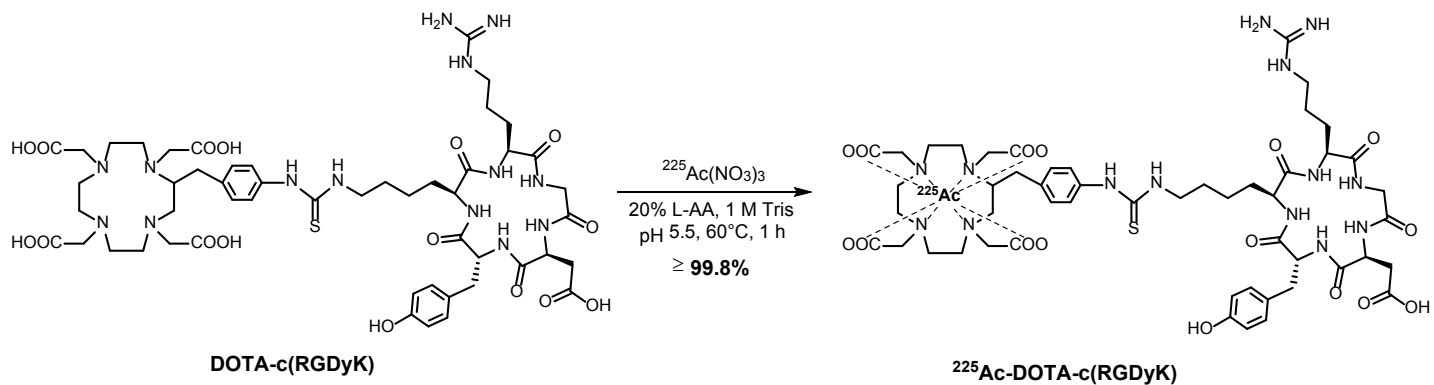

**Scheme S2. Radiochemical synthesis of <sup>225</sup>Ac-DOTA-c(RGDyK)**

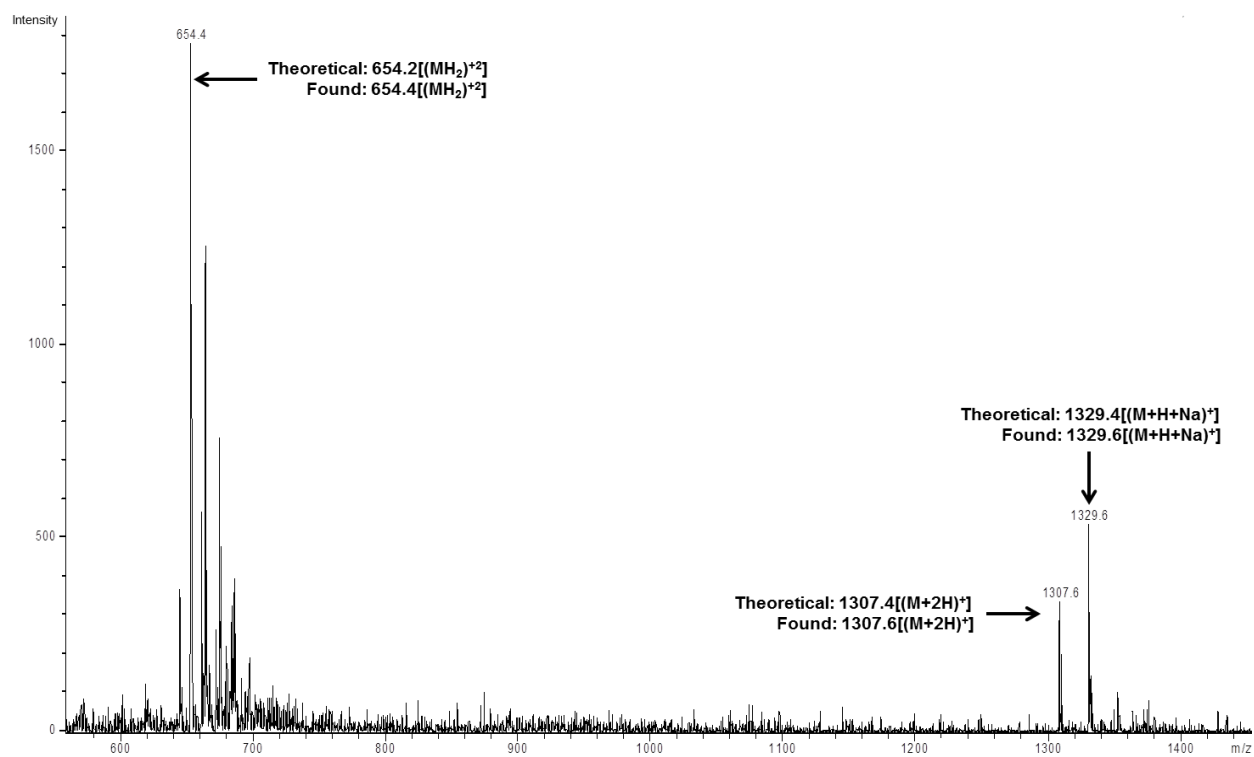

**Figure S1. ESI-MS analysis of La-DOTA-c(RGDyK)**

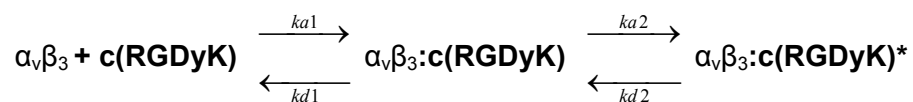

**Figure S2. Reversible two-state bimolecular interaction model for integrin binding**

This model was used to determine the forward ( $k_{a1}$ , L/mol-sec) and reverse ( $k_{d1}$ ,  $\text{sec}^{-1}$ ) rate constants for the initial binding step (indicated by “:”) and forward ( $k_{a2}$ ,  $\text{sec}^{-1}$ ) and reverse ( $k_{d2}$ ,  $\text{sec}^{-1}$ ) rate constants for the subsequent stabilizing conformational change (indicated by “\*”).

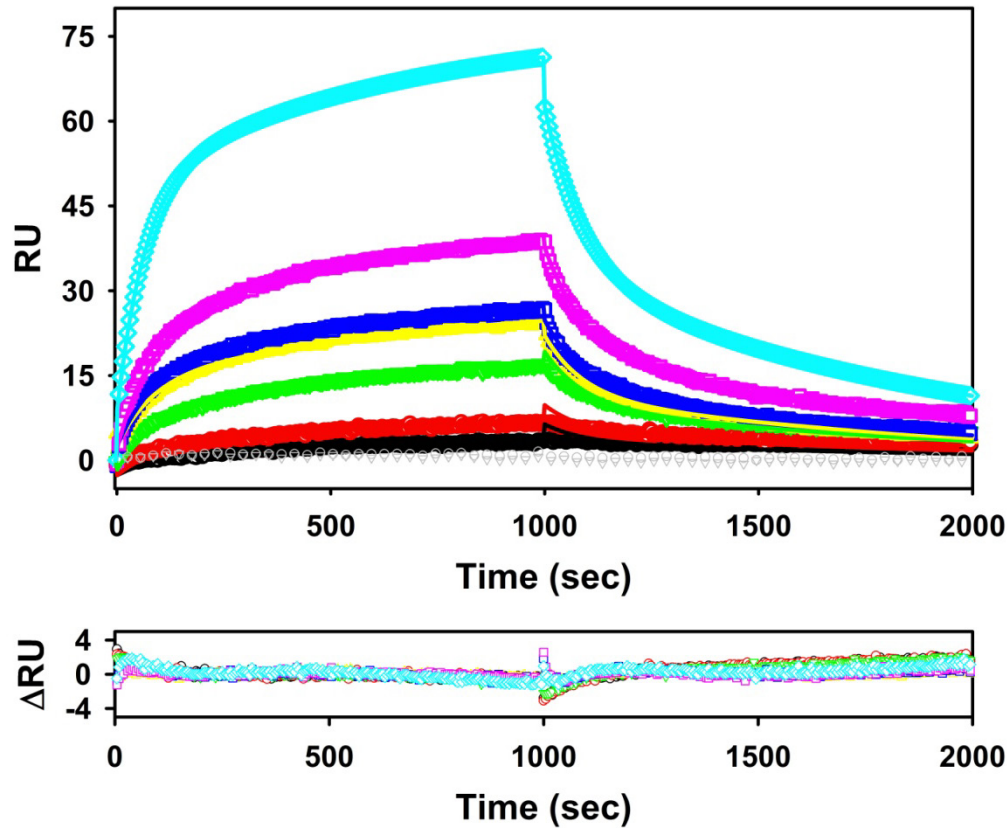

**Figure S3. Recombinant human  $\alpha_v\beta_3$  binding to immobilized c(RGDyK) monitored by surface plasmon resonance spectroscopy**

Increasing concentrations of  $\alpha_v\beta_3$  were delivered to c(RGDyK) immobilized on a biosensor chip. Complex formation was measured for 1000 sec; dissociation was monitored for 1000 sec as HBS flowed over the chip. The surface was regenerated with 20 mM EDTA, then 5 M NaCl, prior to the next cycle. Open symbols denote  $\alpha_v\beta_3$  concentrations (nM): 3 (black circles), 10 (red circles), 30 (green triangles), 59 (yellow triangles), 83 (blue squares), 100 (red squares), and 300 nM (blue diamonds). Gray symbols denote  $\alpha_v\beta_3$  (30 nM) binding data obtained in the presence of excess c(RGDyK) in solution: 11-fold (circles) or 115-fold (triangles). Fitting the complete data set (including 4  $\alpha_v\beta_3$  replicates at 83 nM) to a two-state bimolecular interaction model yielded the solid lines (same color code). Residuals (differences between experimental data and fits) are presented in the same color code in the lower panel.

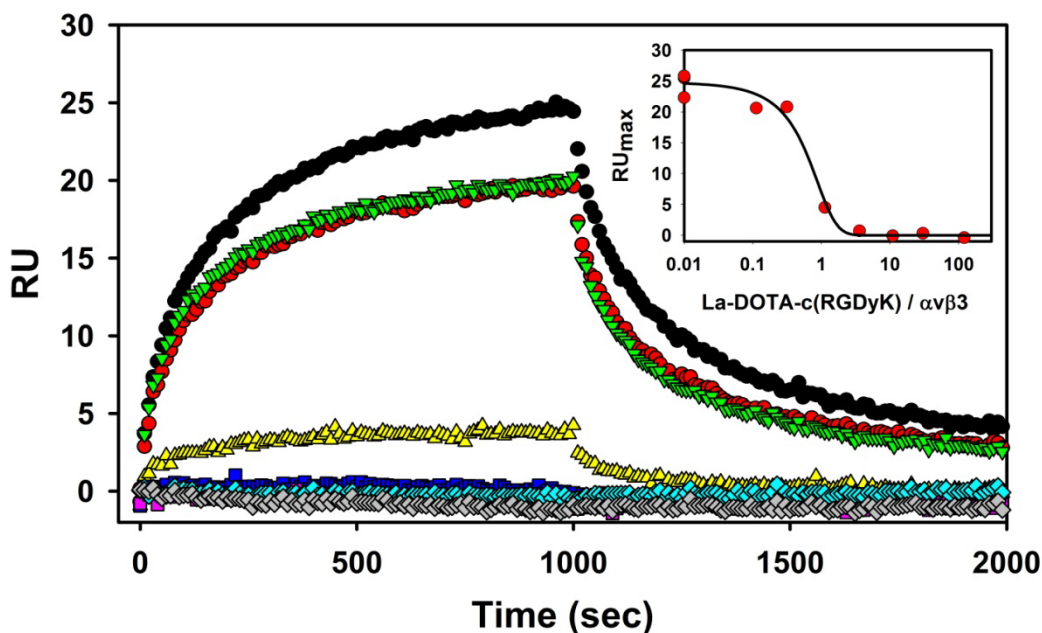

**Figure S4. La-DOTA-c(RGDyK) inhibition of  $\alpha_v\beta_3$ :c(RGDyK) binding monitored by surface plasmon resonance spectroscopy**

Samples of  $\alpha_v\beta_3$  (83 nM), in the presence of increasing concentrations of La-DOTA-c(RGDyK), were delivered to c(RGDyK) immobilized on a biosensor, while complex formation was measured for 1000 sec. Dissociation was monitored for 1000 sec followed by regeneration. Symbols denote the La-DOTA-c(RGDyK) concentrations (nM): 0 (black), 9.4 (red circles), 26.3 (green triangles), 94 (yellow triangles), 300 (blue squares), 915 (red squares), 2515 (green diamonds), or 10061 (gray diamonds). **Insert:** Maximum RU vs molar excess of La-DOTA-c(RGDyK) over  $\alpha_v\beta_3$ . Solid line obtained by fitting the complete data set (including 4  $\alpha_v\beta_3$  replicates at 83 nM) to a competitive inhibition model by nonlinear regression, yielding half-maximal inhibition at  $0.40 \pm 0.16$ -fold molar excess.

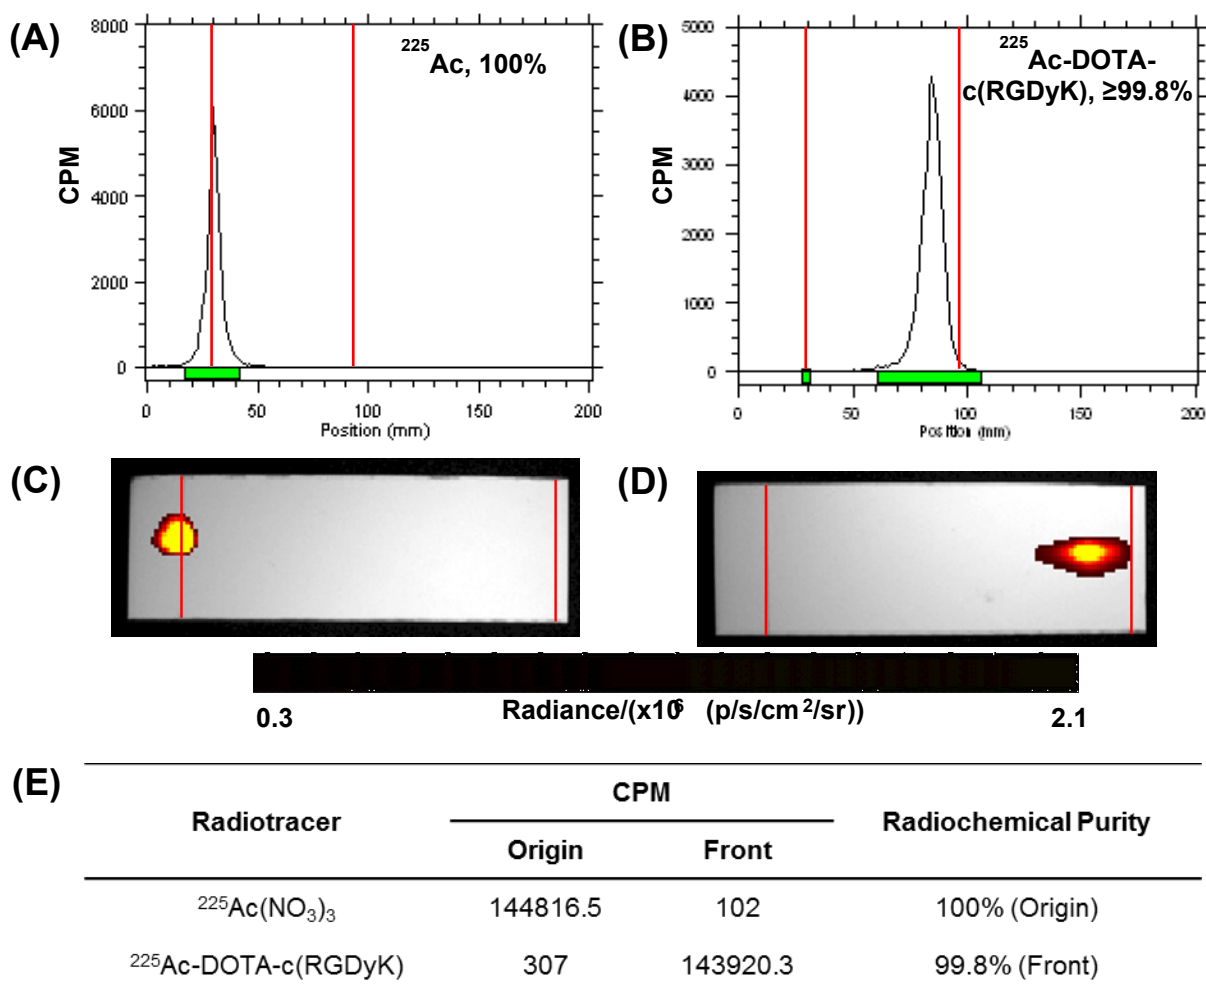

**Figure S5. Quality control of  $^{225}\text{Ac-DOTA-c(RGDyK)}$**

Un-chelated  $^{225}\text{Ac}$  remained at the origin ( $R_f = 0$ ) **(A)**; the  $^{225}\text{Ac-DOTA-c(RGDyK)}$  moves near the solvent front ( $R_f = 0.857$ ) **(B)**. CLI imaging **(C and D)** and gamma counting **(E)** of the TLC plates 24 h after development corroborates the original radio-TLC observations. Based upon all three methods,  $^{225}\text{Ac-DOTA-c(RGDyK)}$  has a purity greater than 99.8%.

**Table S1. *In vitro* serum stability of  $^{225}\text{Ac}$ -DOTA-c(RGDyK) (n = 4)**

| <b>Day</b> | <b>% Intact of <math>^{225}\text{Ac}</math>-DOTA-c(RGDyK)</b> |                      |
|------------|---------------------------------------------------------------|----------------------|
|            | <b>Radio-TLC scanner</b>                                      | <b>Gamma counter</b> |
| 0          | 100                                                           | 100                  |
| 2          | 98.9 $\pm$ 0.5                                                | 98.6 $\pm$ 0.4       |
| 4          | 98.1 $\pm$ 0.6                                                | 97.9 $\pm$ 0.7       |
| 6          | 97.4 $\pm$ 0.7                                                | 97.3 $\pm$ 0.5       |
| 8          | 96.6 $\pm$ 0.4                                                | 96.4 $\pm$ 0.6       |
| 10         | 95.7 $\pm$ 0.5                                                | 95.8 $\pm$ 0.3       |

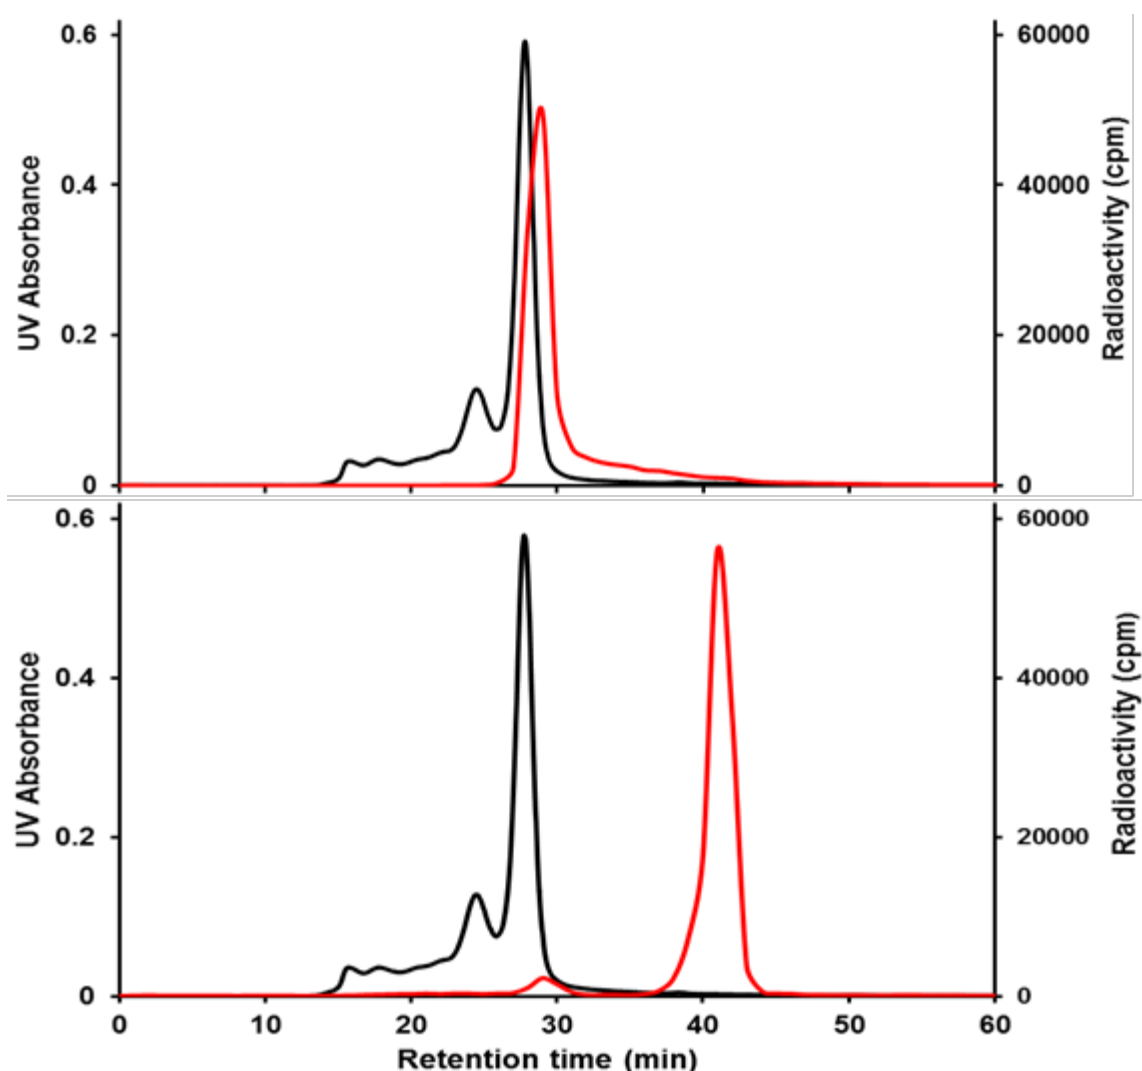

**Figure S6. *In vitro* serum stability of  $^{225}\text{Ac}$ -DOTA-c(RGDyK) by size exclusion-HPLC**

UV-SE-HPLC (220 nm, black) and radio-SE-HPLC chromatogram (red) of  $^{225}\text{Ac}(\text{NO}_3)_3$  (top) and  $^{225}\text{Ac}$ -DOTA-c(RGDyK) (bottom) in serum after 10 days. Black lines are the UV absorbance due to the human serum components; red lines are the radiotracer associated with  $^{225}\text{Ac}$ . Based upon this analysis, only 5% of the activity is transchelated to serum proteins, consistent with the radio-TLC studies.

**Table S2. Biodistribution data (mean %ID/g  $\pm$  SD ) of  $^{225}\text{Ac}$ -DOTA-c(RGDyK) at 1 h, 4 h, 4h-blocking, and 24 h post-injection in U87MG tumor-bearing nude mice (n = 6/cohort)**

| <b>Tissue/Organ</b> | <b>1 h</b>        | <b>4 h</b>        | <b>4 h-blocking</b> | <b>24 h</b>       |
|---------------------|-------------------|-------------------|---------------------|-------------------|
| Blood               | 0.318 $\pm$ 0.075 | 0.028 $\pm$ 0.004 | 0.013 $\pm$ 0.014   | 0.006 $\pm$ 0.001 |
| Heart               | 2.619 $\pm$ 0.483 | 1.196 $\pm$ 0.352 | 0.142 $\pm$ 0.070   | 0.765 $\pm$ 0.365 |
| Lung                | 6.412 $\pm$ 1.054 | 1.805 $\pm$ 0.655 | 0.288 $\pm$ 0.110   | 0.964 $\pm$ 0.570 |
| Liver               | 1.885 $\pm$ 0.173 | 1.746 $\pm$ 0.173 | 0.430 $\pm$ 0.047   | 0.902 $\pm$ 0.159 |
| Kidney              | 5.798 $\pm$ 1.444 | 2.475 $\pm$ 0.148 | 1.396 $\pm$ 0.206   | 1.857 $\pm$ 0.325 |
| Spleen              | 5.770 $\pm$ 1.361 | 2.330 $\pm$ 0.648 | 0.462 $\pm$ 0.191   | 2.761 $\pm$ 1.309 |
| Pancreas            | 0.972 $\pm$ 0.157 | 0.583 $\pm$ 0.231 | 0.025 $\pm$ 0.030   | 0.412 $\pm$ 0.039 |
| Stomach             | 1.373 $\pm$ 0.503 | 0.879 $\pm$ 0.231 | 0.074 $\pm$ 0.017   | 0.433 $\pm$ 0.103 |
| Small Intestine     | 2.264 $\pm$ 0.152 | 1.198 $\pm$ 0.194 | 0.106 $\pm$ 0.022   | 0.695 $\pm$ 0.088 |
| Large Intestine     | 1.143 $\pm$ 0.116 | 1.661 $\pm$ 0.327 | 0.300 $\pm$ 0.072   | 0.457 $\pm$ 0.108 |
| Muscle              | 1.537 $\pm$ 0.367 | 0.473 $\pm$ 0.282 | 0.011 $\pm$ 0.012   | 0.481 $\pm$ 0.150 |
| Fat                 | 0.086 $\pm$ 0.044 | 0.053 $\pm$ 0.030 | 0.011 $\pm$ 0.022   | 0.040 $\pm$ 0.014 |
| Bone                | 1.749 $\pm$ 0.507 | 1.346 $\pm$ 0.184 | 0.585 $\pm$ 0.253   | 1.014 $\pm$ 0.214 |
| Tumor               | 3.718 $\pm$ 0.486 | 2.684 $\pm$ 0.375 | 0.257 $\pm$ 0.085   | 1.714 $\pm$ 0.145 |

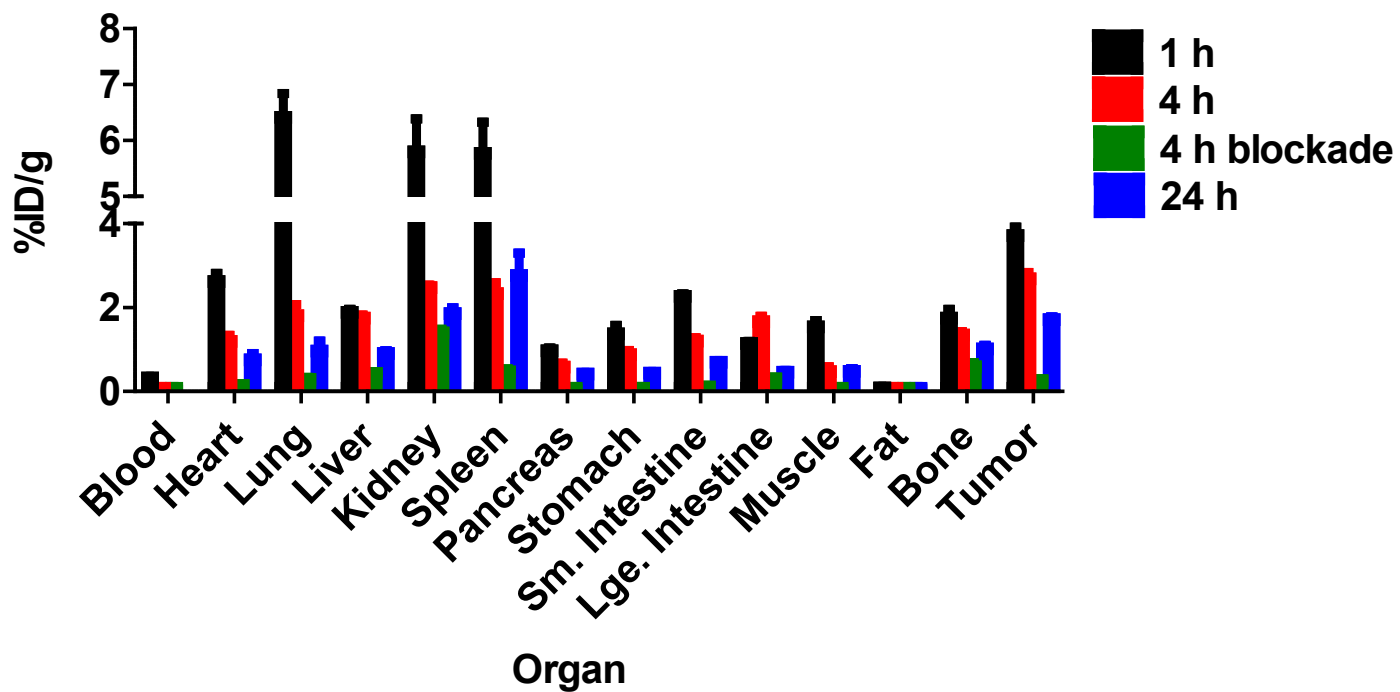

Figure S7. Graphical summary: biodistribution data (mean %ID/g  $\pm$  SD ) of  $^{225}\text{Ac}$ -DOTA-c(RGDyK) at 1 h, 4 h, 4h-blocking, and 24 h post-injection in U87MG tumor-bearing nude mice (n = 6/cohort)

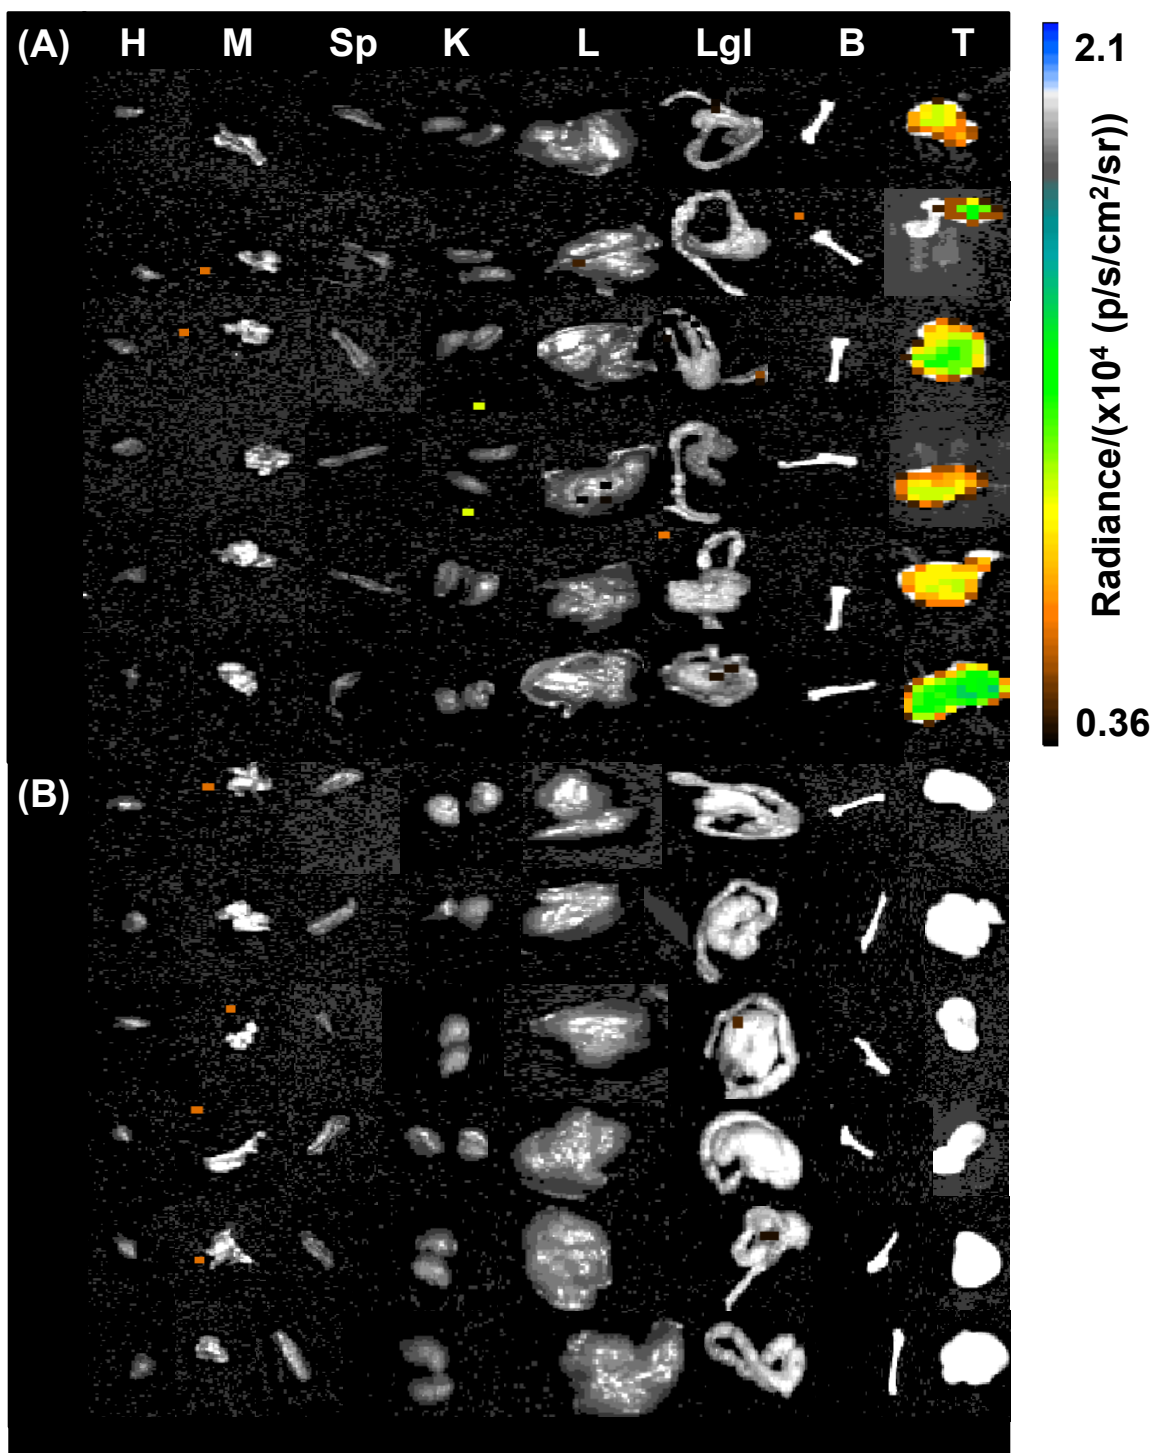

**Figure S8. Ex vivo Cerenkov luminescence imaging of selected organs**

(A) *Ex vivo* imaging of the organs detected Cerenkov emissions from the tumors. (B) c(RGDyK) blockade reduces Cerenkov emissions from the tumors and corroborates the *in vivo* results. Organs: Heart (H), Spleen (Sp), Tumor (T), Muscle (M), Kidney (K), Bone (B), Large Intestine (Lgl), Liver (L).

**Table S3. Estimated average tumor and kidney dose for animals (n = 6/cohort) receiving  $^{225}\text{Ac}$ -DOTA-c(RGDyK)**

|                                     | Tumor  | Kidney |
|-------------------------------------|--------|--------|
| $A_0$ ( $\mu\text{Ci}$ )            | 0.0021 | 0.0025 |
| $\lambda_e$ , ( $\text{h}^{-1}$ )   | 0.01   | 0.035  |
| $T_e$ (d)                           | 2.89   | 0.83   |
| Acc ( $\mu\text{Ci}\cdot\text{h}$ ) | 0.21   | 0.071  |
| Dose (rad)                          | 28.78  | 30.10  |
| Dose equivalent H (Sv)              | 5.76   | 6.02   |

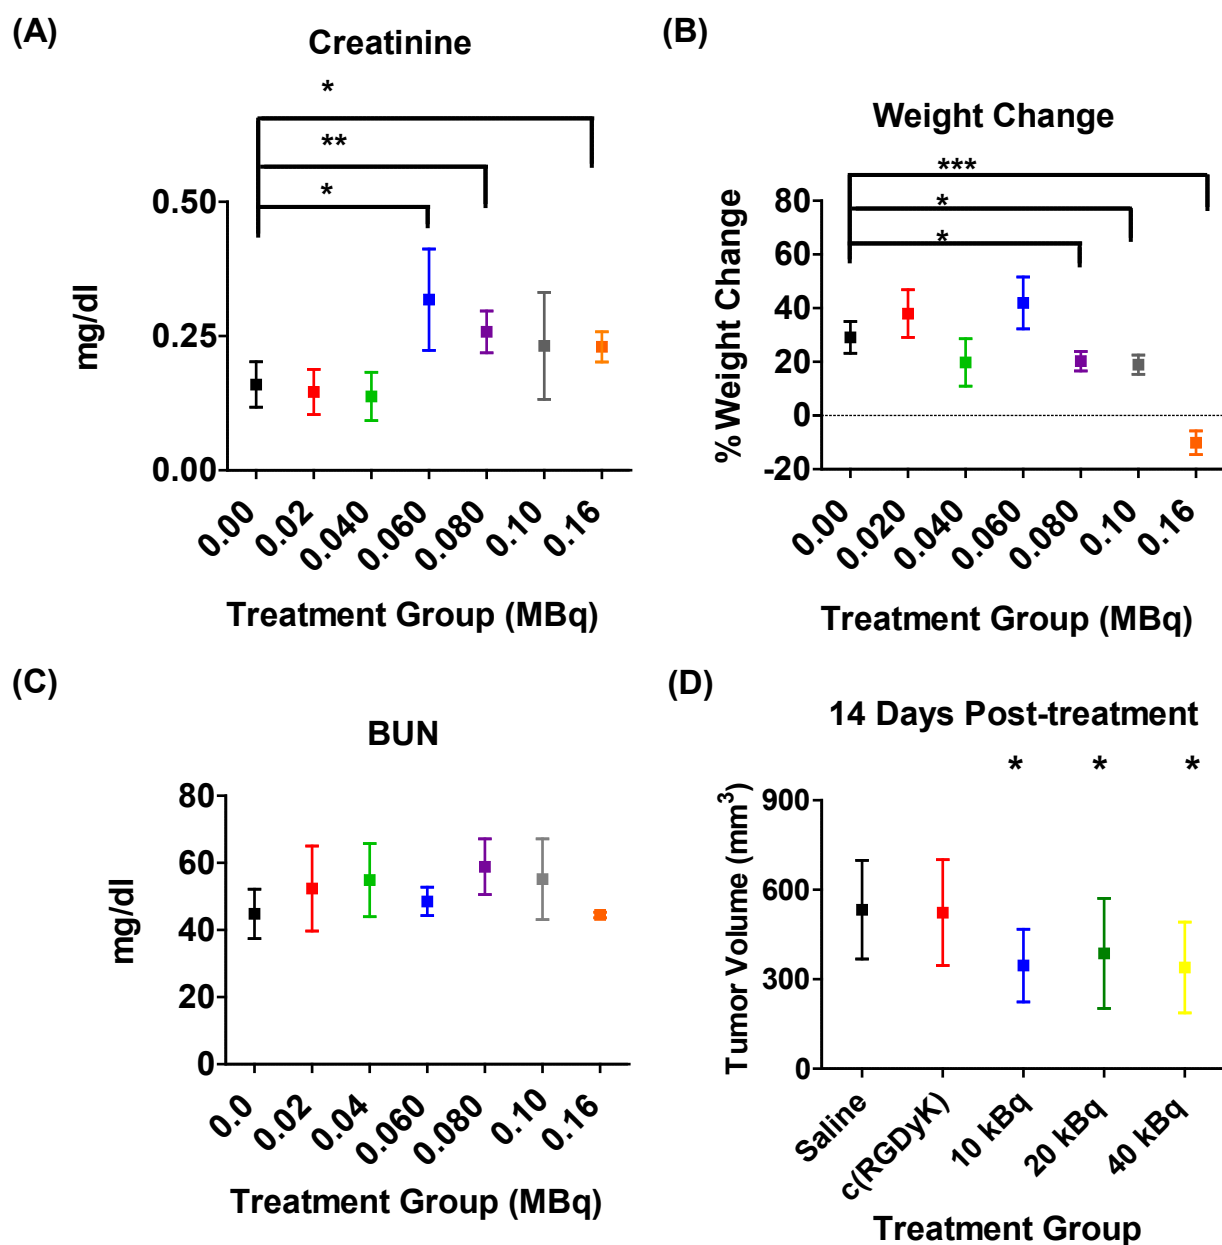

**Figure S9. Maximum tolerated dose and preliminary therapy studies of <sup>225</sup>Ac-DOTA-c(RGDyK)**

Low doses of <sup>225</sup>Ac-DOTA-c(RGDyK) did not reduce kidney function (**A** and **C**) or cause weight loss (**B**) during the MTD study. (**D**) Animals (n = 10/cohort) treated with <sup>225</sup>Ac-DOTA-c(RGDyK) demonstrated decreased tumor burden compared to control animals (n = 10/cohort). \* = p < 0.05, \*\* = p < 0.01, \*\*\* = p < 0.001.

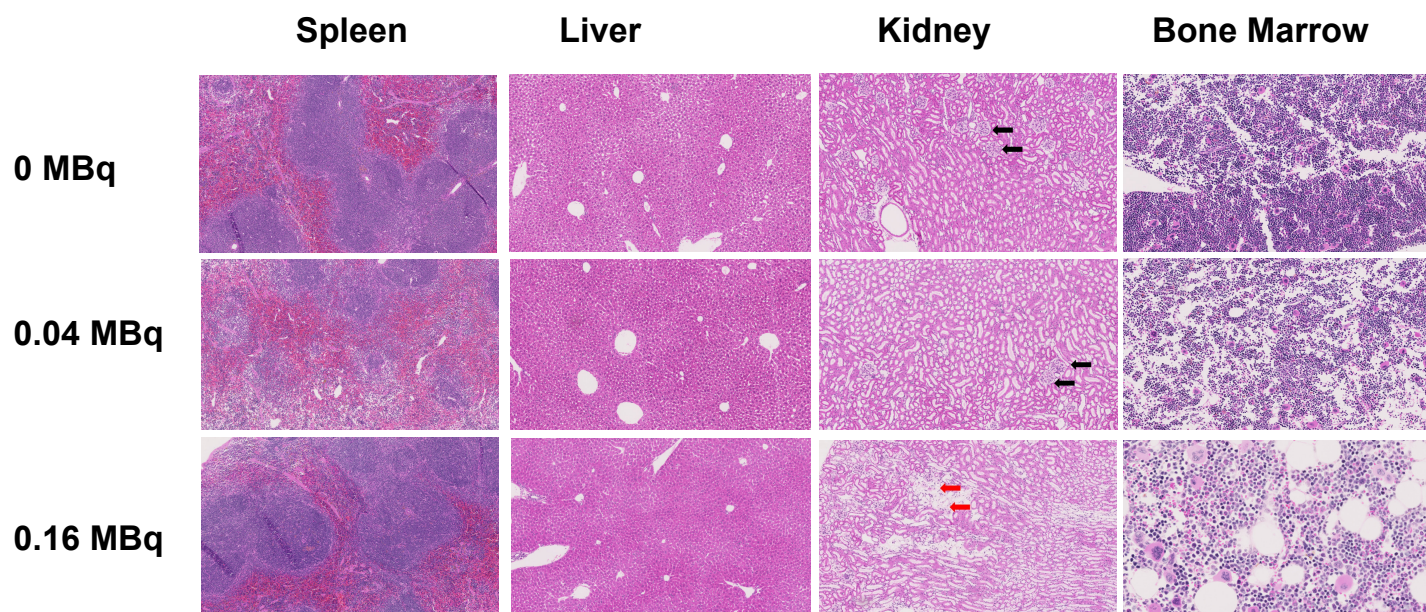

**Figure S10. Histology of select tissues from MTD studies**

Only animals receiving the largest (0.16 MBq) dose of  $^{225}\text{Ac}$ -DOTA-c(RGDyK) demonstrated glomerular loss, which represents irreparable kidney damage (red arrows). Animals receiving the MTD (0.04 MBq) of  $^{225}\text{Ac}$ -DOTA-c(RGDyK) did not demonstrate kidney damage. Glomeruli (black arrows) were unremarkable in appearance and resembled the glomeruli (black arrows) of animals receiving saline (0 MBq). All other tissues including spleen, liver and bone marrow were normal. Sections (6  $\mu\text{m}$ ) are stained with hematoxylin and eosin. Magnification is 10X for all images except bone marrow (20X).
